# Supplementary material
Source: Springer Nature journal article supplement (https://www.springermedizin.de/resource/supplementary/12889_2009_2312_MOESM8_ESM.pdf/9485352)
Supplement: MOESM8 [file 9485352]

| Interventions                                                                                                                 | FSW | MSM | IDU | SDC | Preg | PI | HCW | Young | G pop |
|-------------------------------------------------------------------------------------------------------------------------------|-----|-----|-----|-----|------|----|-----|-------|-------|
| <b>I. Interventions that affect knowledge, attitude and beliefs and influence psychological and social correlates of risk</b> |     |     |     |     |      |    |     |       |       |
| Abstinence-only programs                                                                                                      |     |     |     |     |      |    |     |       |       |
| Abstinence-plus programs                                                                                                      |     |     |     |     |      |    |     |       |       |
| Community-based education                                                                                                     |     |     |     |     |      |    |     |       |       |
| Mass media campaigns                                                                                                          |     |     |     |     |      |    |     |       |       |
| Peer education                                                                                                                |     |     |     |     |      |    |     |       |       |
| Routine (provider-initiated) voluntary HIV screening at healthcare settings                                                   |     |     |     |     |      |    |     |       |       |
| School-based sex education programs (+ life skills)                                                                           |     |     |     |     |      |    |     |       |       |
| Voluntary HIV counselling and testing (VCT) (+ STI clinic and condom distribution)                                            |     |     |     |     |      |    |     |       |       |
| Workplace-based education (+condom distribution / free STI clinic)                                                            |     |     |     |     |      |    |     |       |       |
| <b>II. Harm reduction interventions that lower the risk of a behaviour, but do not eliminate the behaviour</b>                |     |     |     |     |      |    |     |       |       |
| Condom use (availability and accessibility)                                                                                   |     |     |     |     |      |    |     |       |       |
| Introduction of female condoms                                                                                                |     |     |     |     |      |    |     |       |       |
| Needle and syringe program                                                                                                    |     |     |     |     |      |    |     |       |       |
| Needle social marketing                                                                                                       |     |     |     |     |      |    |     |       |       |
| Street outreach                                                                                                               |     |     |     |     |      |    |     |       |       |
| <b>III. Biological/biomedical interventions that strive to reduce HIV infection and transmission risk</b>                     |     |     |     |     |      |    |     |       |       |
| HIV vaccine                                                                                                                   |     |     |     |     |      |    |     |       |       |
| STI control                                                                                                                   |     |     |     |     |      |    |     |       |       |
| Mass or community treatment of sexually transmitted infections                                                                |     |     |     |     |      |    |     |       |       |
| Male circumcision                                                                                                             |     |     |     |     |      |    |     |       |       |
| Microbicides                                                                                                                  |     |     |     |     |      |    |     |       |       |
| Post-exposure prophylaxis                                                                                                     |     |     |     |     |      |    |     |       |       |
| Prevention of mother-to-child transmission of HIV                                                                             |     |     |     |     |      |    |     |       |       |
| Screening blood products and donated organs for HIV                                                                           |     |     |     |     |      |    |     |       |       |
| Substitution treatment                                                                                                        |     |     |     |     |      |    |     |       |       |
| Using nucleic acid test screening (NAT) of volunteer blood donations                                                          |     |     |     |     |      |    |     |       |       |
| <b>IV. Mitigation of barriers to prevention and negative social outcomes of HIV infection</b>                                 |     |     |     |     |      |    |     |       |       |
| Increased alcohol tax                                                                                                         |     |     |     |     |      |    |     |       |       |
| Microfinance                                                                                                                  |     |     |     |     |      |    |     |       |       |
| Microfinance (combined with education)                                                                                        |     |     |     |     |      |    |     |       |       |

The colour of effectiveness and cost-effectiveness

| Colours            | Effectiveness      | Cost-effectiveness     | Description                                                                          |
|--------------------|--------------------|------------------------|--------------------------------------------------------------------------------------|
| <b>dark green</b>  | Yes                | Yes                    | The intervention proven to be effective and cost-effective                           |
| <b>light green</b> | Yes                | Data not available     | The intervention proven to be effective but no evidence regarding cost-effectiveness |
| <b>orange</b>      | Yes                | No                     | The intervention proven to be effective but not cost-effective                       |
| <b>red</b>         | No                 | No, data not available | The intervention proven to be neither effective nor cost-effective                   |
| <b>white</b>       | Data not available | Data not available     | No evidence concerning effectiveness or cost-effectiveness of the intervention       |
| <b>grey</b>        |                    |                        | The intervention is not relevant or used for particular target population            |
